# Supplementary material for: Effect of early goal-directed therapy on mortality in patients with severe sepsis or septic shock: a meta-analysis of randomised controlled trials
Source: PubMed Central journal article supplement — BMJ Open. 2016 Mar 1;6(3):e008330. doi: 10.1136/bmjopen-2015-008330 (PMC4785309; doi:10.1136/bmjopen-2015-008330), 2016-03-01
Supplement: bmjopen-2015-008330supp_appendix1.pdf [file bmjopen-2015-008330supp_appendix1.pdf]

## **Appendix 1: Electronic search strategies**

### **Medline/Pubmed**

1. "Sepsis"[Mesh]
2. Severe Sepsis
3. Septic Shock
4. Septicemia
5. Septicaemia
6. Pyohemia
7. Pyaemia
8. Pyemia
9. 1 or 2 or 3 or 4 or 5 or 6 or 7 or 8
10. EGDT
11. Goal Directed Therapy
12. Early Resuscitation
13. Protocol Based
14. Early Goal Directed Strategy
15. 10 or 11 or 12 or 13 or 14
16. Randomized controlled trial [pt]
17. Controlled clinical trial [pt]
18. Randomized [tiab]
19. Randomly [tiab]
20. Trail [tiab]
21. Groups [tiab]
22. 16 or 17 or 18 or 19 or 20 or 21
23. 9 and 15 and 22

### **Embase/Ovid**

1. Sepsis.ab,at,kw.
2. Severe Sepsis.ab,at,kw.
3. Septic Shock.ab,at,kw.
4. Septicemia.ab,at,kw.
5. Septicaemia.ab,at,kw.

6. Pyohemia.ab,at,kw.
7. Pyaemia.ab,at,kw.
8. Pyemia.ab,at,kw.
9. 1 or 2 or 3 or 4 or 5 or 6 or 7 or 8
10. EGDT.ab,at,kw.
11. Goal Directed Therapy.ab,at,kw.
12. Early Resuscitation.ab,at,kw.
13. Protocol Based.ab,at,kw.
14. Early Goal Directed Strategy.ab,at,kw.
15. 10 or 11 or 12 or 13 or 14
16. Randomized controlled trial.pt.
17. Controlled clinical trial.pt.
18. Randomized.ab,at.
19. Randomly.ab,at.
20. Trail.ab,at.
21. Groups.ab,at.
22. 16 or 17 or 18 or 19 or 20 or 21
23. 9 and 15 and 22
24. limit 23 to original article , human, embase record

### **Cochrane library**

1. Mesh descriptor: [Sepsis] explode all trees
2. Severe Sepsis
3. Septic Shock
4. Septicemia
5. Septicaemia
6. Pyohemia
7. Pyaemia
8. Pyemia
9. 1 or 2 or 3 or 4 or 5 or 6 or 7 or 8
10. EGDT
11. Goal Directed Therapy
12. Early Resuscitation

13. Protocol Based
14. Early Goal Directed Strategy
15. 10 or 11 or 12 or 13 or 14
16. Randomized controlled trial:pt
17. Controlled clinical trial:pt
18. Randomized:ti,ab
19. Randomly:ti,ab
20. Trail:ti,ab
21. Groups:ti,ab
22. 16 or 17 or 18 or 19 or 20 or 21
23. 9 and 15 and 22
