# Supplementary material for: Effect of early goal-directed therapy on mortality in patients with severe sepsis or septic shock: a meta-analysis of randomised controlled trials
Source: PubMed Central journal article supplement — BMJ Open. 2016 Mar 1;6(3):e008330. doi: 10.1136/bmjopen-2015-008330 (PMC4785309; doi:10.1136/bmjopen-2015-008330), 2016-03-01
Supplement: bmjopen-2015-008330supp_appendix2.pdf [file bmjopen-2015-008330supp_appendix2.pdf]

## Appendix 2 Subgroup analyses for mortality

| Subgroups                             | No. of studies | No. of patients<br>(EGDT/Control) | RR (95% CI)     | P value | I <sup>2</sup> (%) | P value for I <sup>2</sup> |
|---------------------------------------|----------------|-----------------------------------|-----------------|---------|--------------------|----------------------------|
| Multi-center trials <sup>a</sup>      | 4              | 2013/2020                         | 0.92(0.79,1.06) | 0.25    | 49                 | 0.12                       |
| Patients in septic shock <sup>b</sup> | 4              | 1926/1944                         | 0.94(0.79,1.12) | 0.51    | 47                 | 0.13                       |
| Control group <sup>a</sup>            |                |                                   |                 |         |                    |                            |
| Usual care                            | 3              | 1856/1874                         | 1.02(0.90,1.16) | 0.71    | 0                  | 0.77                       |
| Standard therapy                      | 3              | 726/725                           | 0.78(0.50,1.22) | 0.28    | 84                 | 0.002                      |

<sup>a</sup>The mortality endpoint was 28-day reported by each trial.

<sup>b</sup>The mortality was calculated by the in-hospital death data.
