# Supplementary material for: Effect of early goal-directed therapy on mortality in patients with severe sepsis or septic shock: a meta-analysis of randomised controlled trials
Source: PubMed Central journal article supplement — BMJ Open. 2016 Mar 1;6(3):e008330. doi: 10.1136/bmjopen-2015-008330 (PMC4785309; doi:10.1136/bmjopen-2015-008330), 2016-03-01
Supplement: bmjopen-2015-008330supp_appendix3.pdf [file bmjopen-2015-008330supp_appendix3.pdf]

## Appendix 3 GRADE summary of findings

### Goal-directed therapy compared to control for sepsis

**Patient or population:** Adult Patients with Sepsis

**Intervention:** Early Goal-Directed Therapy

**Comparison:** Control

| 28-day mortality |                   |                          |                      |                        |                      |                                                                                                                          |                      |                  |                        |                                              |                                                                                                                        |         |
|------------------|-------------------|--------------------------|----------------------|------------------------|----------------------|--------------------------------------------------------------------------------------------------------------------------|----------------------|------------------|------------------------|----------------------------------------------|------------------------------------------------------------------------------------------------------------------------|---------|
| No of studies    | Study design      | Quality assessment       |                      |                        |                      |                                                                                                                          | Other considerations | No of patients   |                        | Effect                                       |                                                                                                                        | Quality |
|                  |                   | Risk of bias             | Inconsistency        | Indirectness           | Imprecision          | 28-day mortality                                                                                                         |                      | placebo          | Relative (95% CI)      | Absolute (95% CI)                            |                                                                                                                        |         |
| 5                | randomised trials | not serious <sup>1</sup> | serious <sup>2</sup> | serious <sup>3,4</sup> | serious <sup>5</sup> | publication bias strongly suspected all plausible residual confounding would reduce the demonstrated effect <sup>6</sup> | 442/2143 (20.6%)     | 487/2153 (22.6%) | RR 0.86 (0.69 to 1.06) | 32 fewer per 1000 (from 14 more to 70 fewer) | <br>VERY LOW <sup>1,2,3,4,5,6</sup> |         |
|                  |                   |                          |                      |                        |                      |                                                                                                                          |                      | 24.5%            |                        | 34 fewer per 1000 (from 15 more to 76 fewer) |                                                                                                                        |         |

MD – mean difference, RR – relative risk

1. Lack of blinding in all included studies except Rivers et al study
2. Moderate heterogeneity (I<sup>2</sup> =71%) was found
3. Different Protocols between control groups were found
4. High differences of mortality between Rivers and harmonized trials were found
5. RR with 95% CI for total trial was 0.86(0.69,1.06). So the largest portion of the meta analysis favor EGDT
6. The publication bias was not assessed because of the limit of the amount of included studies

| 60-day mortality |                   |                          |               |                        |             |                                                                                                                          |                      |                  |                        |                                              |                                                                                                                      |         |
|------------------|-------------------|--------------------------|---------------|------------------------|-------------|--------------------------------------------------------------------------------------------------------------------------|----------------------|------------------|------------------------|----------------------------------------------|----------------------------------------------------------------------------------------------------------------------|---------|
| No of studies    | Study design      | Quality assessment       |               |                        |             |                                                                                                                          | Other considerations | No of patients   |                        | Effect                                       |                                                                                                                      | Quality |
|                  |                   | Risk of bias             | Inconsistency | Indirectness           | Imprecision | 60-day mortality                                                                                                         |                      | placebo          | Relative (95% CI)      | Absolute (95% CI)                            |                                                                                                                      |         |
| 4                | randomised trials | not serious <sup>1</sup> | not serious   | serious <sup>2,3</sup> | not serious | publication bias strongly suspected all plausible residual confounding would reduce the demonstrated effect <sup>4</sup> | 450/1986 (22.7%)     | 473/2011 (23.5%) | RR 0.94 (0.81 to 1.10) | 14 fewer per 1000 (from 24 more to 45 fewer) | <br>MODERATE <sup>1,2,3,4</sup> |         |
|                  |                   |                          |               |                        |             |                                                                                                                          |                      | 23.6%            |                        | 14 fewer per 1000 (from 24 more to 45 fewer) |                                                                                                                      |         |

MD – mean difference, RR – relative risk

1. Lack of blinding in all included studies except Rivers et al study
2. Different Protocols between control groups were found.
3. High differences of mortality between Rivers and harmonized trials were found.
4. The publication bias was not assessed because of the limit of the amount of included studies

| 90-day mortality   |                   |                          |               |              |             |                                                  |                  |                  |                                  |                                             |                                 |
|--------------------|-------------------|--------------------------|---------------|--------------|-------------|--------------------------------------------------|------------------|------------------|----------------------------------|---------------------------------------------|---------------------------------|
| Quality assessment |                   |                          |               |              |             |                                                  | № of patients    |                  | Effect                           |                                             | Quality                         |
| № of studies       | Study design      | Risk of bias             | Inconsistency | Indirectness | Imprecision | Other considerations                             | 90-day mortality | placebo          | Relative (95% CI)                | Absolute (95% CI)                           |                                 |
| 3                  | randomised trials | not serious <sup>1</sup> | not serious   | not serious  | not serious | publication bias strongly suspected <sup>2</sup> | 460/1820 (25.3%) | 470/1828 (25.7%) | <b>RR 0.98</b><br>(0.88 to 1.10) | 5 fewer per 1000 (from 26 more to 31 fewer) | ⊕⊕⊕○<br>MODERATE <sup>1,2</sup> |
|                    |                   |                          |               |              |             |                                                  |                  | 29.2%            |                                  | 6 fewer per 1000 (from 29 more to 35 fewer) |                                 |

MD – mean difference, RR – relative risk

1. Lack of blinding in the three included studies because of the nature of the intervention,
2. The publication bias was not assessed because of the limit of the amount of included studies
